# Supplementary material for: Cardiac Stress and Inflammatory Markers as Predictors of Heart Failure in Patients With Type 2 Diabetes: The ADVANCE Trial
Source: Oxford University Press journal article supplement (doi:10.2337/dc17-0509), 2017-07-06

## SUPPLEMENTARY DATA

**Supplemental Table 1.** Sensitivity analysis; Discrimination and reclassification statistics (95% CIs) for 5-year risk of heart failure after addition of biomarkers to a model containing clinical risk factors after excluding patients with past history of hospitalization for heart failure

|                                                                    | C-statistic                                | IDI                                      | Relative IDI (%)   | NRI                                     |                                          |
|--------------------------------------------------------------------|--------------------------------------------|------------------------------------------|--------------------|-----------------------------------------|------------------------------------------|
|                                                                    |                                            |                                          |                    | Continuous                              | Categorical <sup>†</sup>                 |
| Base model*                                                        | 0.8007 (0.7585, 0.8430)                    |                                          |                    |                                         |                                          |
| Base model plus IL-6                                               | 0.8098 (0.7690, 0.8506)<br><i>P</i> = 0.11 | 0.015 (0.0005, 0.030)<br><i>P</i> = 0.04 | 5.39 (0.17, 1.49)  | 0.383 (0.176, 0.567)<br><i>P</i> <0.001 | 0.013 (-0.067, 0.078)<br><i>P</i> = 0.48 |
| Base model plus hs-CRP                                             | 0.8125 (0.7713, 0.8538)<br><i>P</i> = 0.17 | 0.028 (0.011, 0.048)<br><i>P</i> <0.001  | 9.90 (3.82, 17.05) | 0.264 (0.074, 46.4)<br><i>P</i> = 0.01  | 0.042 (-0.025, 0.114)<br><i>P</i> = 0.23 |
| Base model plus hs-cTnT                                            | 0.8092 (0.7682, 0.8501)<br><i>P</i> = 0.29 | 0.010 (-0.004, 0.023)<br><i>P</i> = 0.15 | 3.68 (-1.20, 8.29) | 0.427 (0.240, 0.606)<br><i>P</i> <0.001 | 0.013 (-0.087, 0.110)<br><i>P</i> = 0.34 |
| Base model plus NT-proBNP                                          | 0.8747 (0.8441, 0.9052)<br><i>P</i> <0.001 | 0.099 (0.056, 0.145)<br><i>P</i> <0.001  | 35.1 (18.8, 52.1)  | 0.783 (0.615, 0.949)<br><i>P</i> <0.001 | 0.234 (0.117, 0.343)<br><i>P</i> <0.001  |
| Base model plus IL-6, hs-CRP, and hs-cTnT                          | 0.8231 (0.7834, 0.8628)                    |                                          |                    |                                         |                                          |
| Addition of NT-proBNP to base model plus IL-6, hs-CRP, and hs-cTnT | 0.8768 (0.8462, 0.9074)<br><i>P</i> <0.001 | 0.086 (0.044, 0.130)<br><i>P</i> <0.001  | 26.1 (13.4, 40.3)  | 0.661 (0.491, 0.834)<br><i>P</i> <0.001 | 0.209 (0.105, 0.316)<br><i>P</i> <0.001  |
| Base model plus NT-proBNP                                          | 0.8747 (0.8441, 0.9052)                    |                                          |                    |                                         |                                          |
| Addition of IL-6, hs-CRP, and hs-cTnT to base model plus NT-proBNP | 0.8768 (0.8462, 0.9074)<br><i>P</i> = 0.70 | 0.035 (0.016, 0.056)<br><i>P</i> <0.001  | 9.14 (4.22, 14.69) | 0.342 (0.117, 0.526)<br><i>P</i> <0.001 | 0.007 (-0.055, 0.064)<br><i>P</i> = 0.47 |

Results were derived from the random subcohort (n = 2,871).

Biomarkers were log transformed.

\* Base model included the same variables in Table 2 (see caption for Table 2), except for history of hospitalization for heart failure.

<sup>†</sup> Using cutoff points of 5% and 10% 5-year risk.

Abbreviations: IDI, integrated discrimination improvement; HR, hazard ratio; hs-CRP, high-sensitivity C-reactive protein; hs-cTnT, high-sensitivity cardiac troponin T; IL-6, interleukin-6; NRI, net reclassification improvement; NT-proBNP, N-terminal pro-B-type natriuretic peptide.

## SUPPLEMENTARY DATA

**Supplemental Table 2.** Sensitivity analysis; Discrimination and reclassification statistics (95% CIs) for 5-year risk of heart failure after addition of biomarkers to a model containing clinical risk factors after excluding patients with NT-proBNP levels >400 pg/mL

|                                                                    | C-statistic                                 | IDI                                       | Relative IDI (%)   | NRI                                      |                                           |
|--------------------------------------------------------------------|---------------------------------------------|-------------------------------------------|--------------------|------------------------------------------|-------------------------------------------|
|                                                                    |                                             |                                           |                    | Continuous                               | Categorical <sup>†</sup>                  |
| Base model*                                                        | 0.8215 (0.7674, 0.8755)                     |                                           |                    |                                          |                                           |
| Base model plus IL-6                                               | 0.8252 (0.7714, 0.8791)<br><i>P</i> = 0.44  | 0.001 (-0.014, 0.018)<br><i>P</i> = 0.23  | 0.42 (-4.65, 6.20) | 0.215 (-0.051, 0.492)<br><i>P</i> = 0.12 | -0.001 (-0.077, 0.060)<br><i>P</i> = 0.77 |
| Base model plus hs-CRP                                             | 0.8226 (0.7696, 0.8756)<br><i>P</i> = 0.90  | 0.002 (-0.010, 0.012)<br><i>P</i> = 0.51  | 0.59 (-3.08, 4.22) | 0.131 (-0.131, 0.402)<br><i>P</i> = 0.33 | -0.014 (-0.098, 0.062)<br><i>P</i> = 0.75 |
| Base model plus hs-cTnT                                            | 0.8223 (0.7682, 0.8764)<br><i>P</i> = 0.63  | 0.004 (-0.005, 0.015)<br><i>P</i> = 0.39  | 1.38 (-1.87, 4.92) | 0.199 (-0.057, 0.463)<br><i>P</i> = 0.12 | 0.015 (-0.062, 0.092)<br><i>P</i> = 0.58  |
| Base model plus NT-proBNP                                          | 0.8640 (0.8162, 0.9119)<br><i>P</i> = 0.009 | 0.042 (0.009, 0.079)<br><i>P</i> = 0.02   | 15.0 (3.31, 28.0)  | 0.503 (0.268, 0.740)<br><i>P</i> <0.001  | 0.194 (0.082, 0.315)<br><i>P</i> = 0.002  |
| Base model plus IL-6, hs-CRP, and hs-cTnT                          | 0.8264 (0.7737, 0.8791)                     |                                           |                    |                                          |                                           |
| Addition of NT-proBNP to base model plus IL-6, hs-CRP, and hs-cTnT | 0.8647 (0.8171, 0.9123)<br><i>P</i> = 0.01  | 0.036 (0.007, 0.070)<br><i>P</i> = 0.02   | 12.6 (2.10, 24.8)  | 0.400 (0.145, 0.651)<br><i>P</i> = 0.002 | 0.231 (0.109, 0.373)<br><i>P</i> = 0.002  |
| Base model plus NT-proBNP                                          | 0.8640 (0.8162, 0.9119)                     |                                           |                    |                                          |                                           |
| Addition of IL-6, hs-CRP, and hs-cTnT to base model plus NT-proBNP | 0.8647 (0.8171, 0.9123)<br><i>P</i> = 0.88  | 0.0002 (-0.009, 0.010)<br><i>P</i> = 0.10 | 0.06 (-2.91, 3.01) | 0.151 (-0.128, 0.425)<br><i>P</i> = 0.26 | 0.049 (-0.022, 0.131)<br><i>P</i> = 0.19  |

Results were derived from the random subcohort (n = 2,643).

Biomarkers were log transformed.

\* Base model included the same variables in Table 2 (see caption for Table 2).

<sup>†</sup> Using cutoff points of 5% and 10% 5-year risk.

Abbreviations: IDI, integrated discrimination improvement; HR, hazard ratio; hs-CRP, high-sensitivity C-reactive protein; hs-cTnT, high-sensitivity cardiac troponin T; IL-6, interleukin-6; NRI, net reclassification improvement; NT-proBNP, N-terminal pro-B-type natriuretic peptide.

## SUPPLEMENTARY DATA

**Supplementary Figure 1. The case-cohort study design and data availability.**

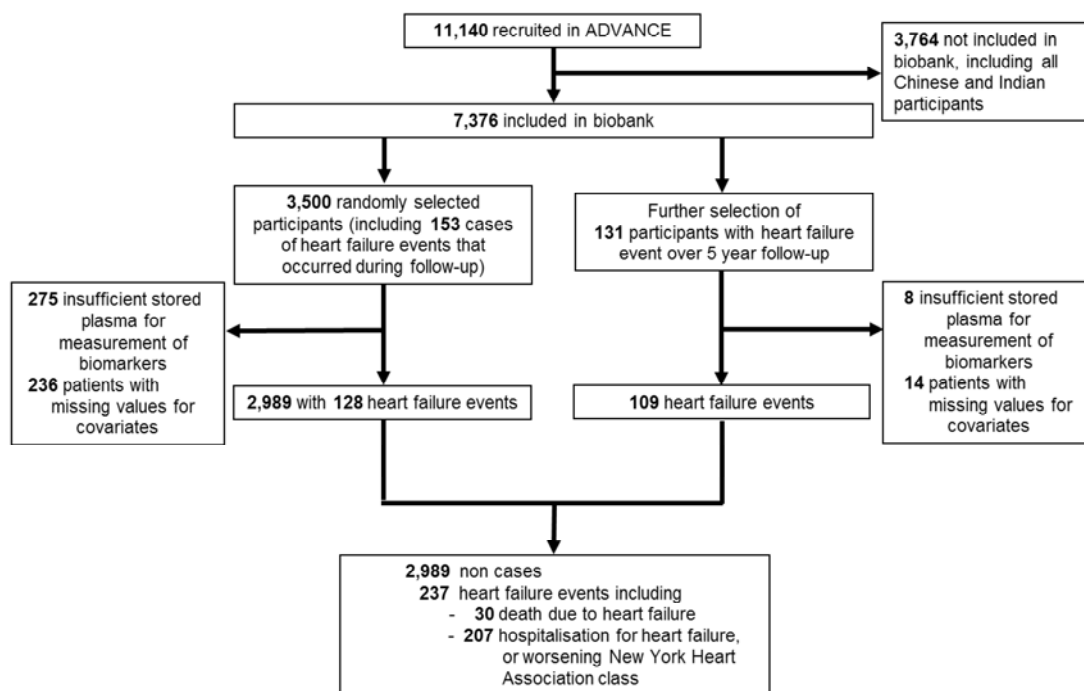

SUPPLEMENTARY DATA

**Supplementary Figure 2. Sensitivity analysis; Adjusted hazard ratios and 95% CIs for heart failure according to a one standard deviation increment in biomarkers after excluding patients with past history of hospitalization for heart failure.**

Abbreviations: ECG, electrocardiogram; HR, hazard ratio; hs-CRP, high-sensitivity C-reactive protein; hs-cTnT, high-sensitivity cardiac troponin T; IL-6, interleukin-6; NT-proBNP, N-terminal pro-B-type natriuretic peptide; SD, standard deviation.

Hazard ratios were adjusted for the variables in Figure 2 (see caption for Figure 2). Model 2 was adjusted for the variables except for history of hospitalization for heart failure.

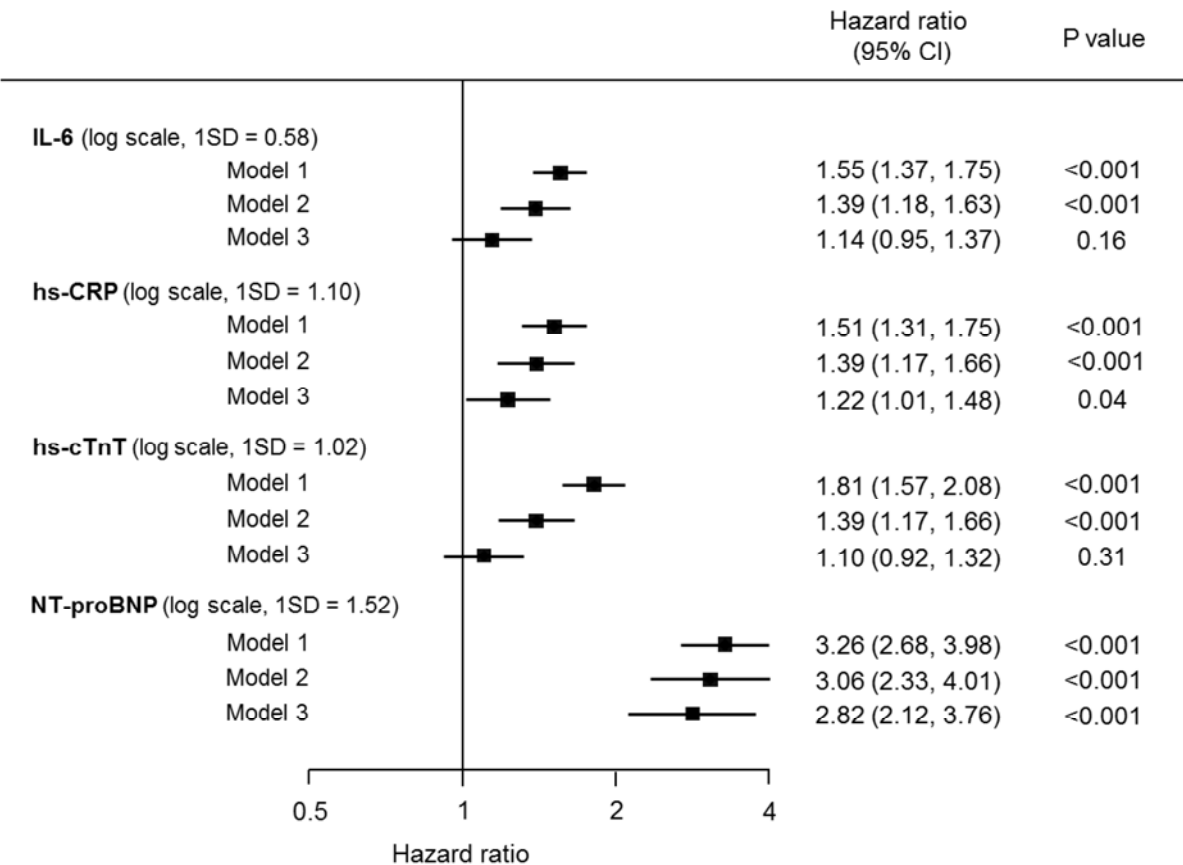

## SUPPLEMENTARY DATA

### Supplementary Figure 3. Sensitivity analysis; Adjusted hazard ratios and 95% CIs for heart failure according to a one standard deviation increment in biomarkers after excluding patients with NT-proBNP levels >400 pg/mL.

Abbreviations: ECG, electrocardiogram; HR, hazard ratio; hs-CRP, high-sensitivity C-reactive protein; hs-cTnT, high-sensitivity cardiac troponin T; IL-6, interleukin-6; NT-proBNP, N-terminal pro-B-type natriuretic peptide; SD, standard deviation.

Hazard ratios were adjusted for the variables in Figure 2 (see caption for Figure 2).

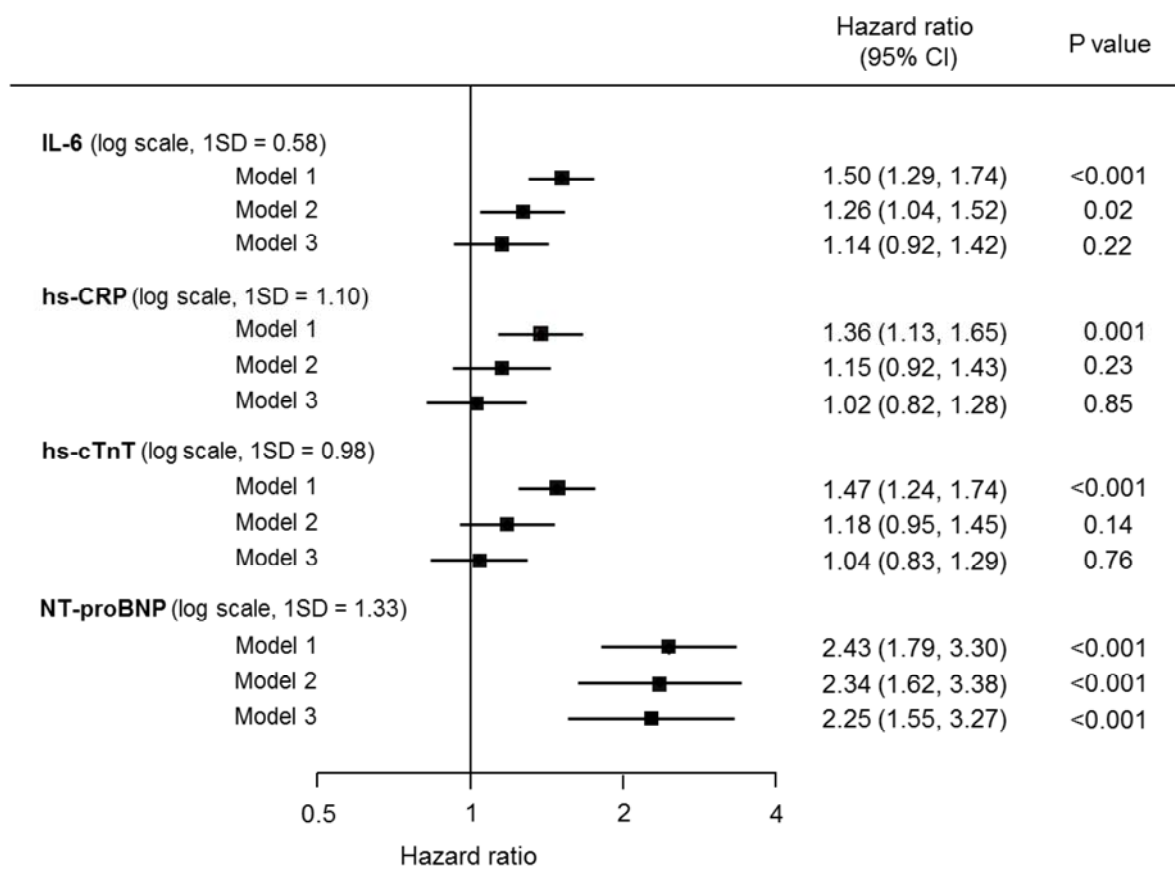

## SUPPLEMENTARY DATA

### Supplementary Figure 4. Adjusted hazard ratios and 95% CIs for heart failure according to a one standard deviation increment in NT-proBNP, stratified by sex, age, duration of diabetes, history of myocardial infarction, and a history of hospitalization for heart failure.

Abbreviations: DM, diabetes mellitus; HF, heart failure; MI, myocardial infarction; NT-proBNP, N-terminal pro-B-type natriuretic peptide.

Hazard ratios were adjusted for the variables in model 2 (see caption for Figure 2), except for myocardial infarction, where insulin was dropped from the model to allow convergence.

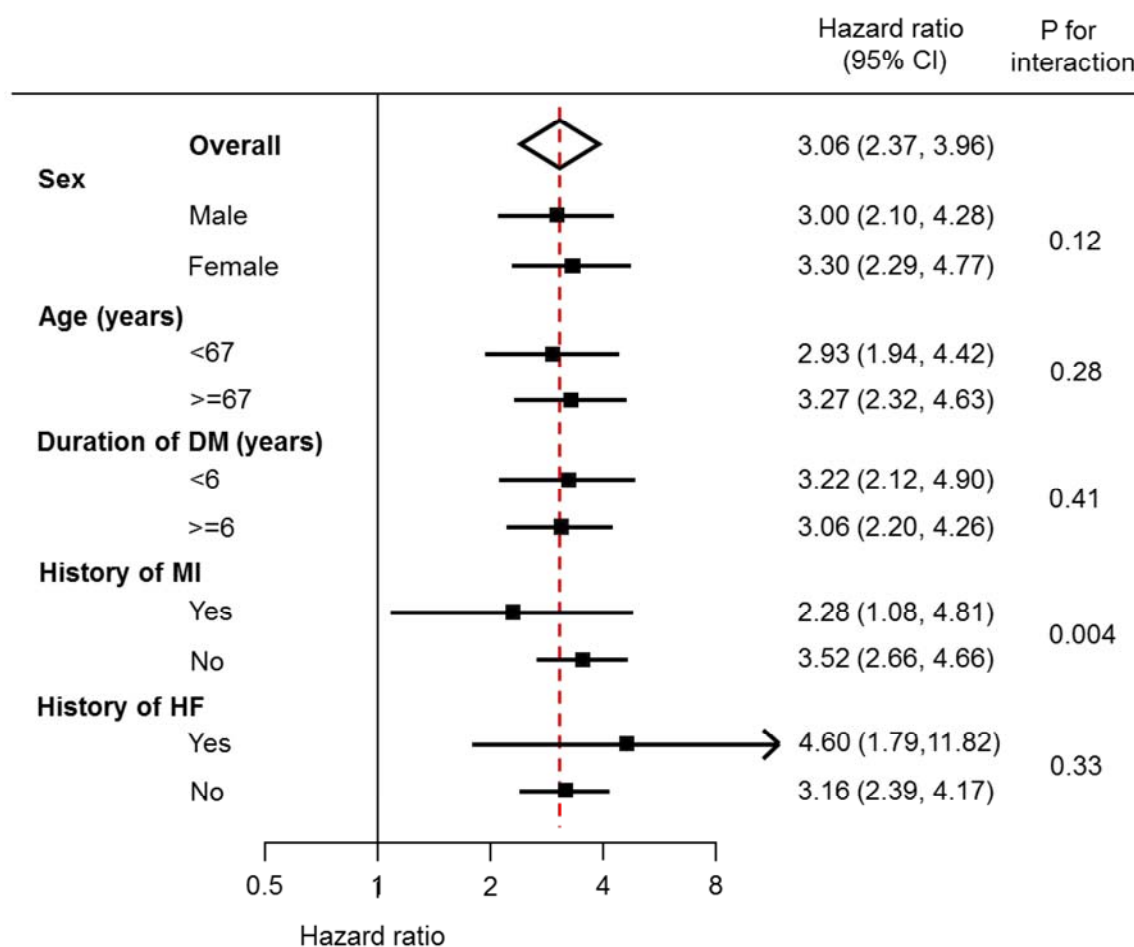

Supplement: dc170509supplementarydata.pdf [file dc170509supplementarydata.pdf]
